# Supplementary material for: GZFLW Induces Apoptosis of Ectopic Endometrial Stromal Cells via Promoting VPS53 Protein Stability
Source: Hindawi journal article supplement (doi:10.1155/2018/1293630), 2018-01-01
Supplement: f1 [file 1293630.f1.pdf]

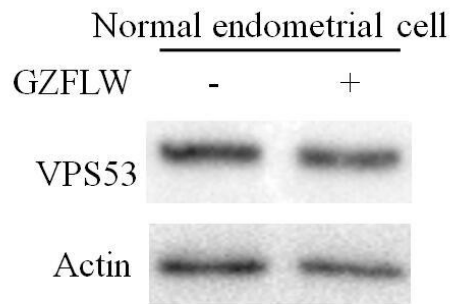

**Sup. VPS53 protein level was not altered after GZFLW treatment in normal endometrial cell.** Western analysis of VPS53 in normal endometrial in the presence of GZFLW or not. Actin as an internal control.
